# Supplementary figures and images for: Construction of cohorts of similar patients from automatic extraction of medical concepts
Source: Research Square preprint supplement (doi:10.21203/rs.3.rs-1661785/v1), 2022-05-26

## Appendix 1: Precision-Recall curves

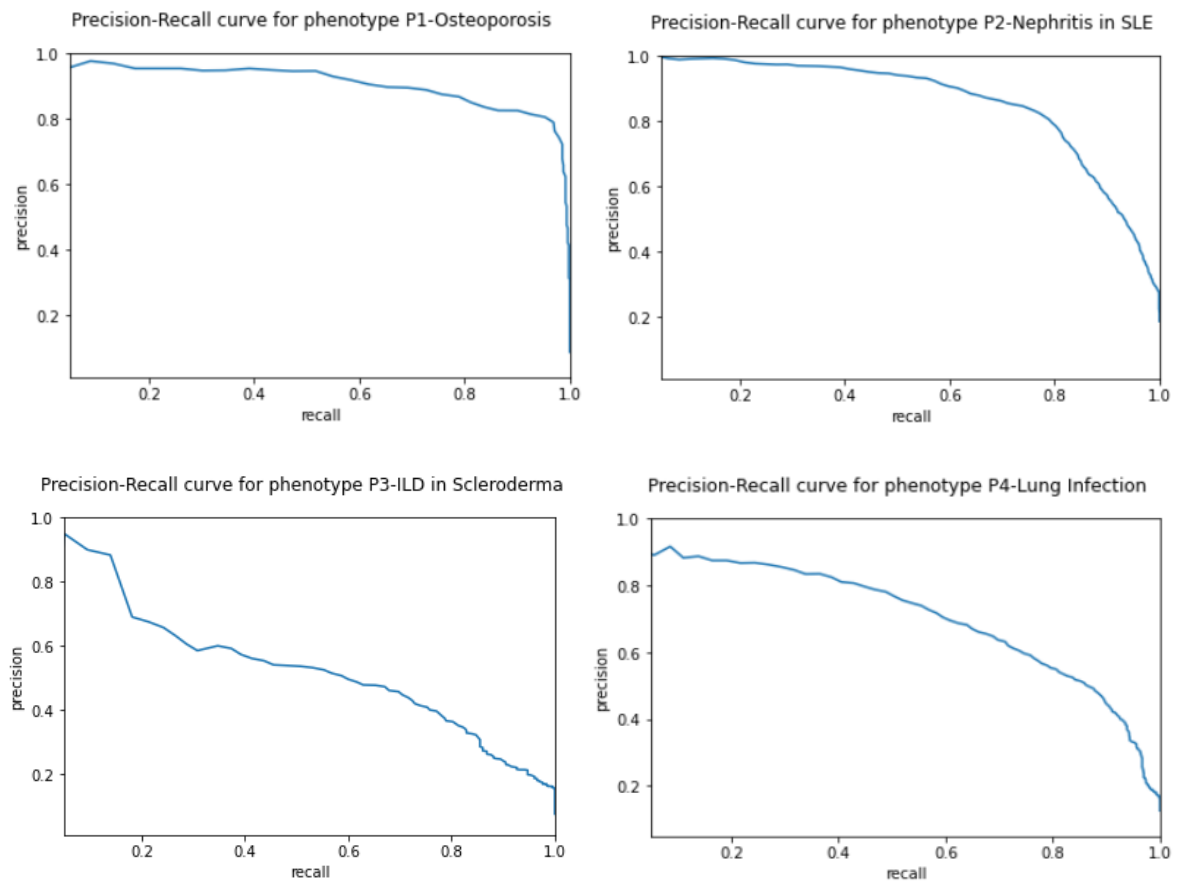

Figure 9: Precision-Recall curves for the four phenotypes

Supplement: Supplementary file 1 [file 97675f7d4d8ec19a44b82781.pdf]
